# Supplementary material for: CBR antimicrobials alter coupling between the bridge helix and the β subunit in RNA polymerase
Source: PubMed Central journal article supplement — Nat Commun. 2014 Mar 6;5:3408. doi: 10.1038/ncomms4408 (PMC3959191; doi:10.1038/ncomms4408), 2014-03-06
Supplement: ncomms4408-s1.pdf [file ncomms4408-s1.pdf]

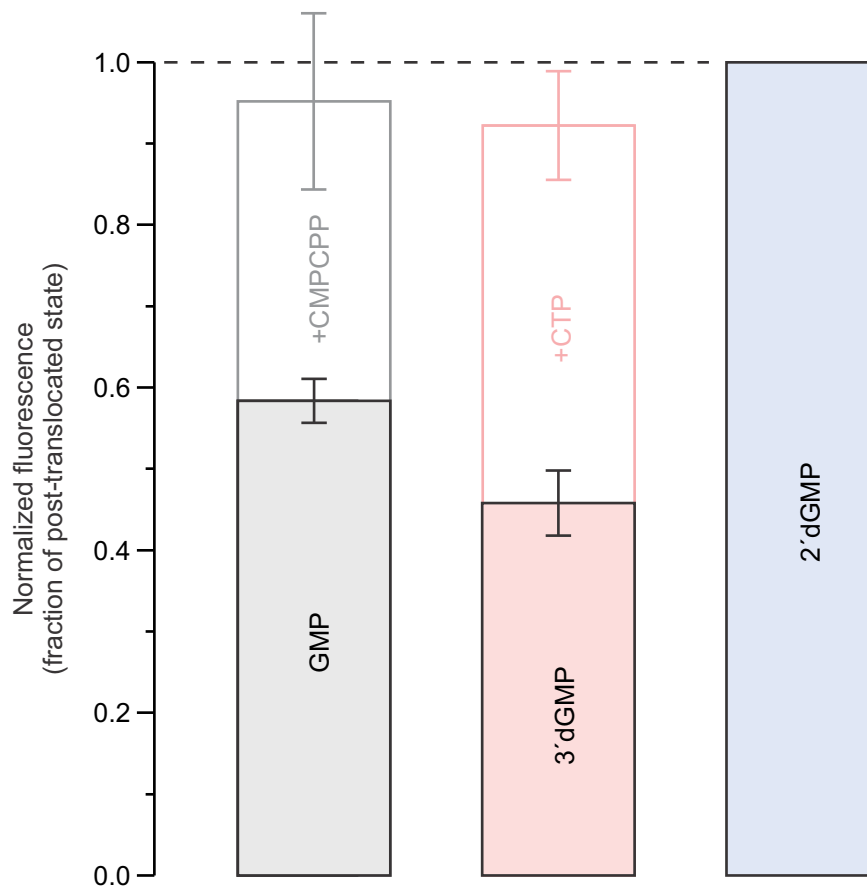

**Supplementary Figure 1:  $\beta$ 'P750L TECs display measurable fractions of the pre-translocated state.** Fluorescence of rNMP (grey fill) and 3'dNMP (pink fill) extended TECs normalized to the level of 2'dNMP extended TECs (pastel blue fill). White bars depict the effects of the next substrate NTP (pink outline) or its nonhydrolyzable analogue (grey outline). Error bars are SDs of three independent experiments.

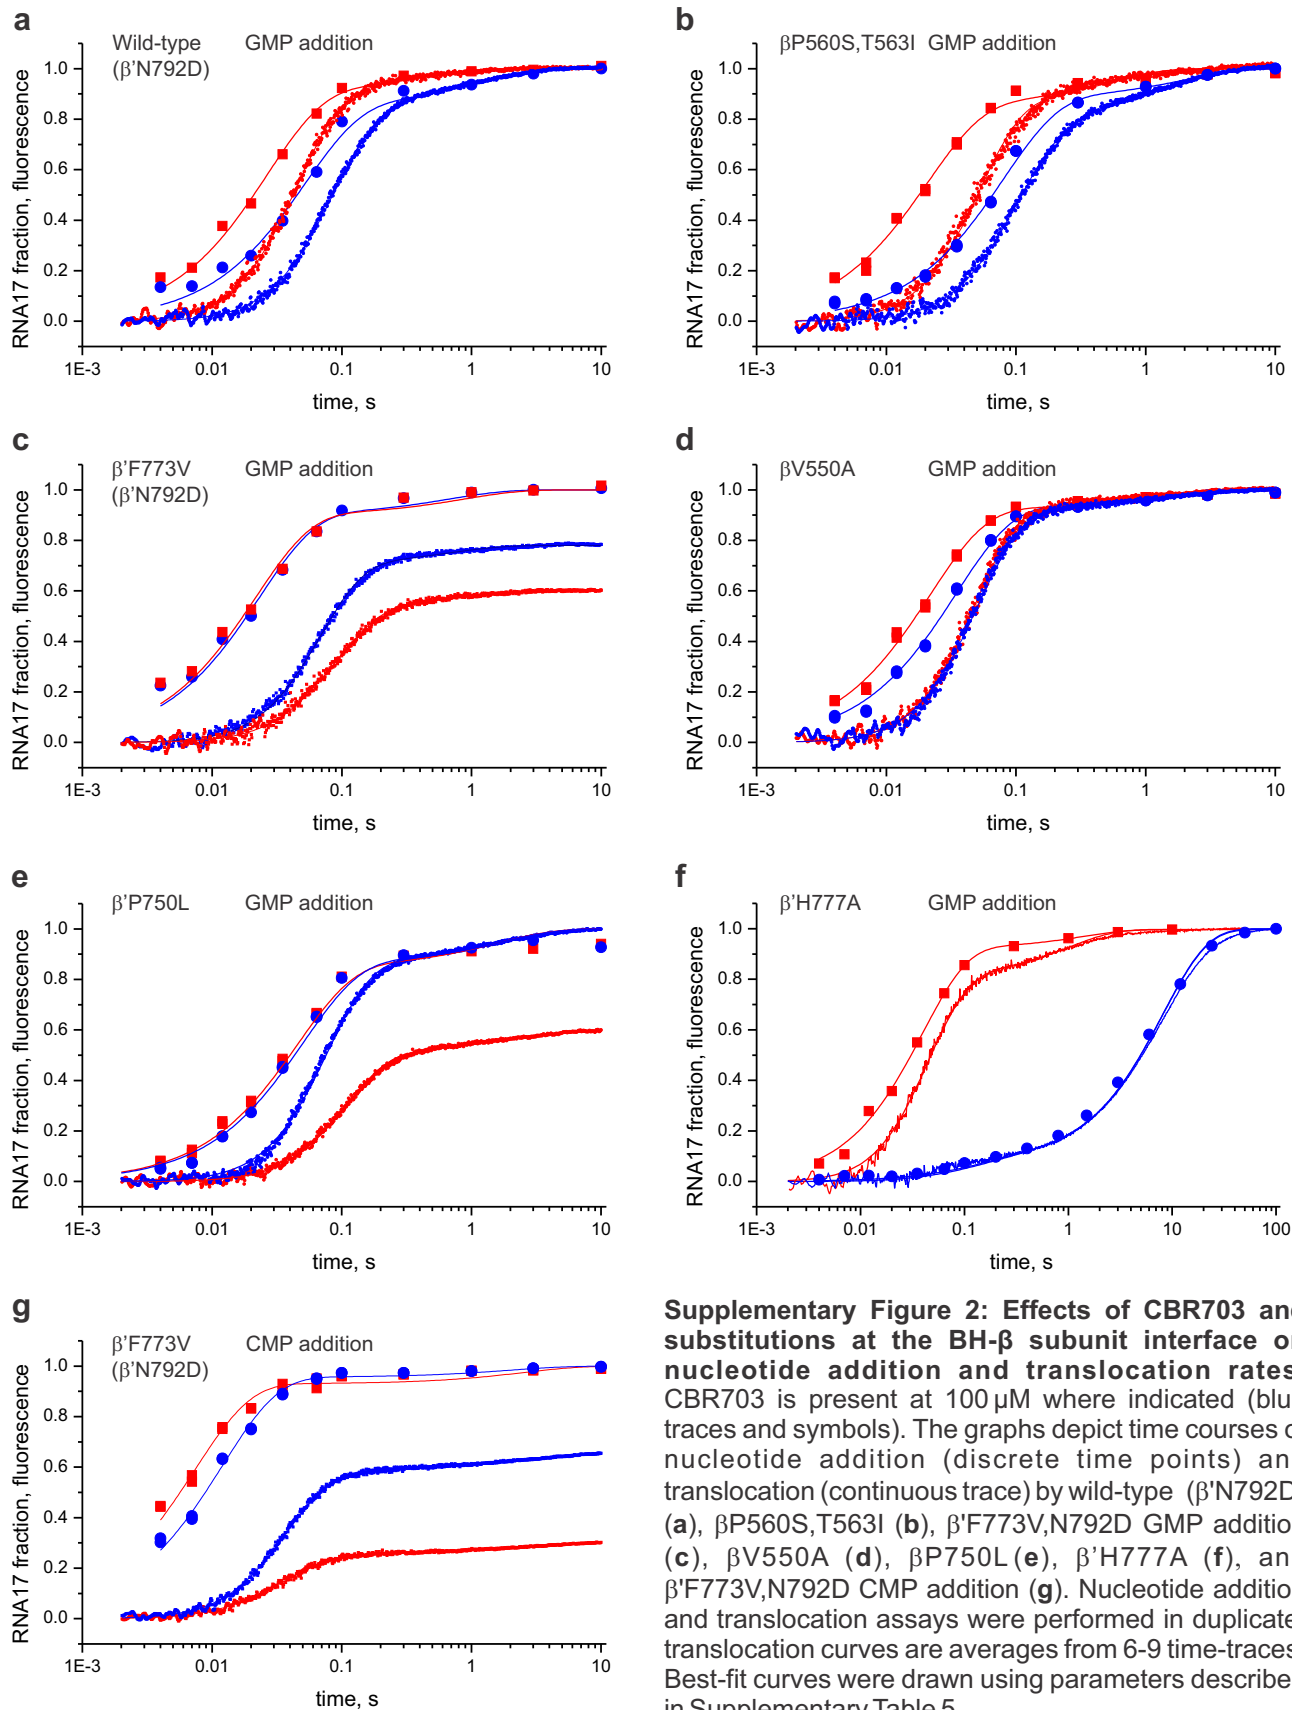

**Supplementary Figure 2: Effects of CBR703 and substitutions at the BH- $\beta$  subunit interface on nucleotide addition and translocation rates.** CBR703 is present at 100  $\mu$ M where indicated (blue traces and symbols). The graphs depict time courses of nucleotide addition (discrete time points) and translocation (continuous trace) by wild-type ( $\beta'$ N792D) (a),  $\beta$ P560S,T563I (b),  $\beta'$ F773V,N792D GMP addition (c),  $\beta$ V550A (d),  $\beta$ P750L (e),  $\beta'$ H777A (f), and  $\beta'$ F773V,N792D CMP addition (g). Nucleotide addition and translocation assays were performed in duplicate, translocation curves are averages from 6-9 time-traces. Best-fit curves were drawn using parameters described in Supplementary Table 5.

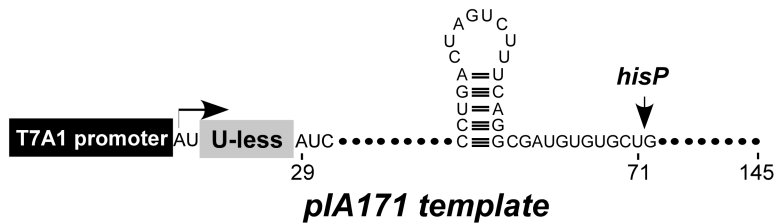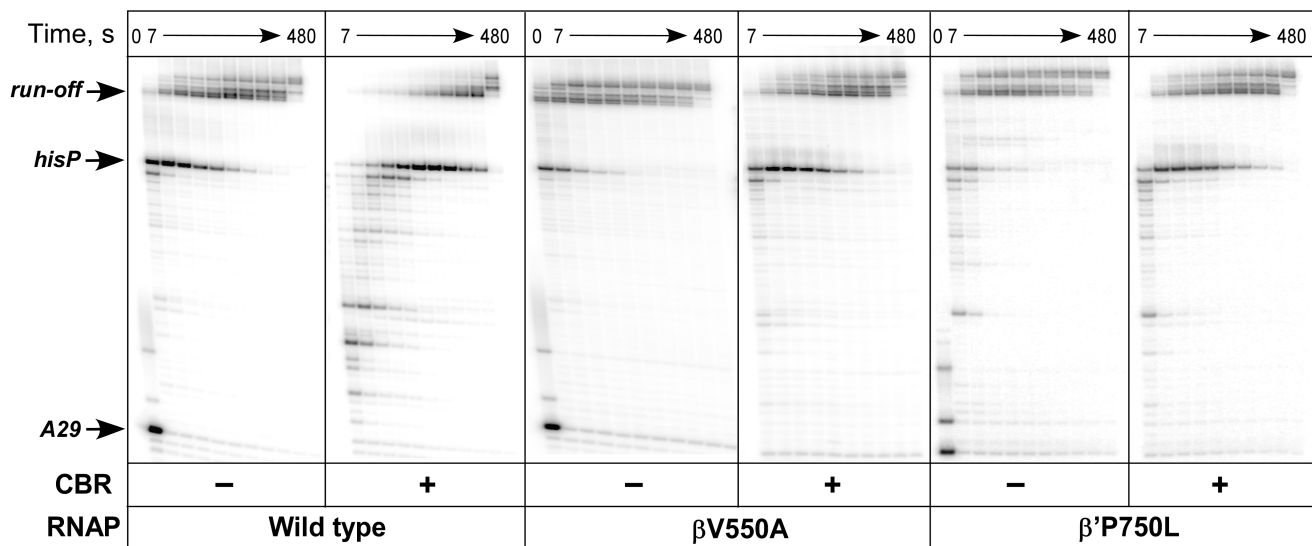

**Supplementary Figure 3: Effects of CBR703 and substitutions at the BH-β subunit interface on pausing at the regulatory pause site.** Transcript elongation on pIA171 template by wild-type, βV550A and β'P750L RNAPs in the absence (*left panels*) or in the presence (*right panels*) of 100 μM CBR703. Quantification of the fraction of RNA at the *hisP* (transcript position U71) is shown in Fig. 4b. Each assay was performed in triplicate.

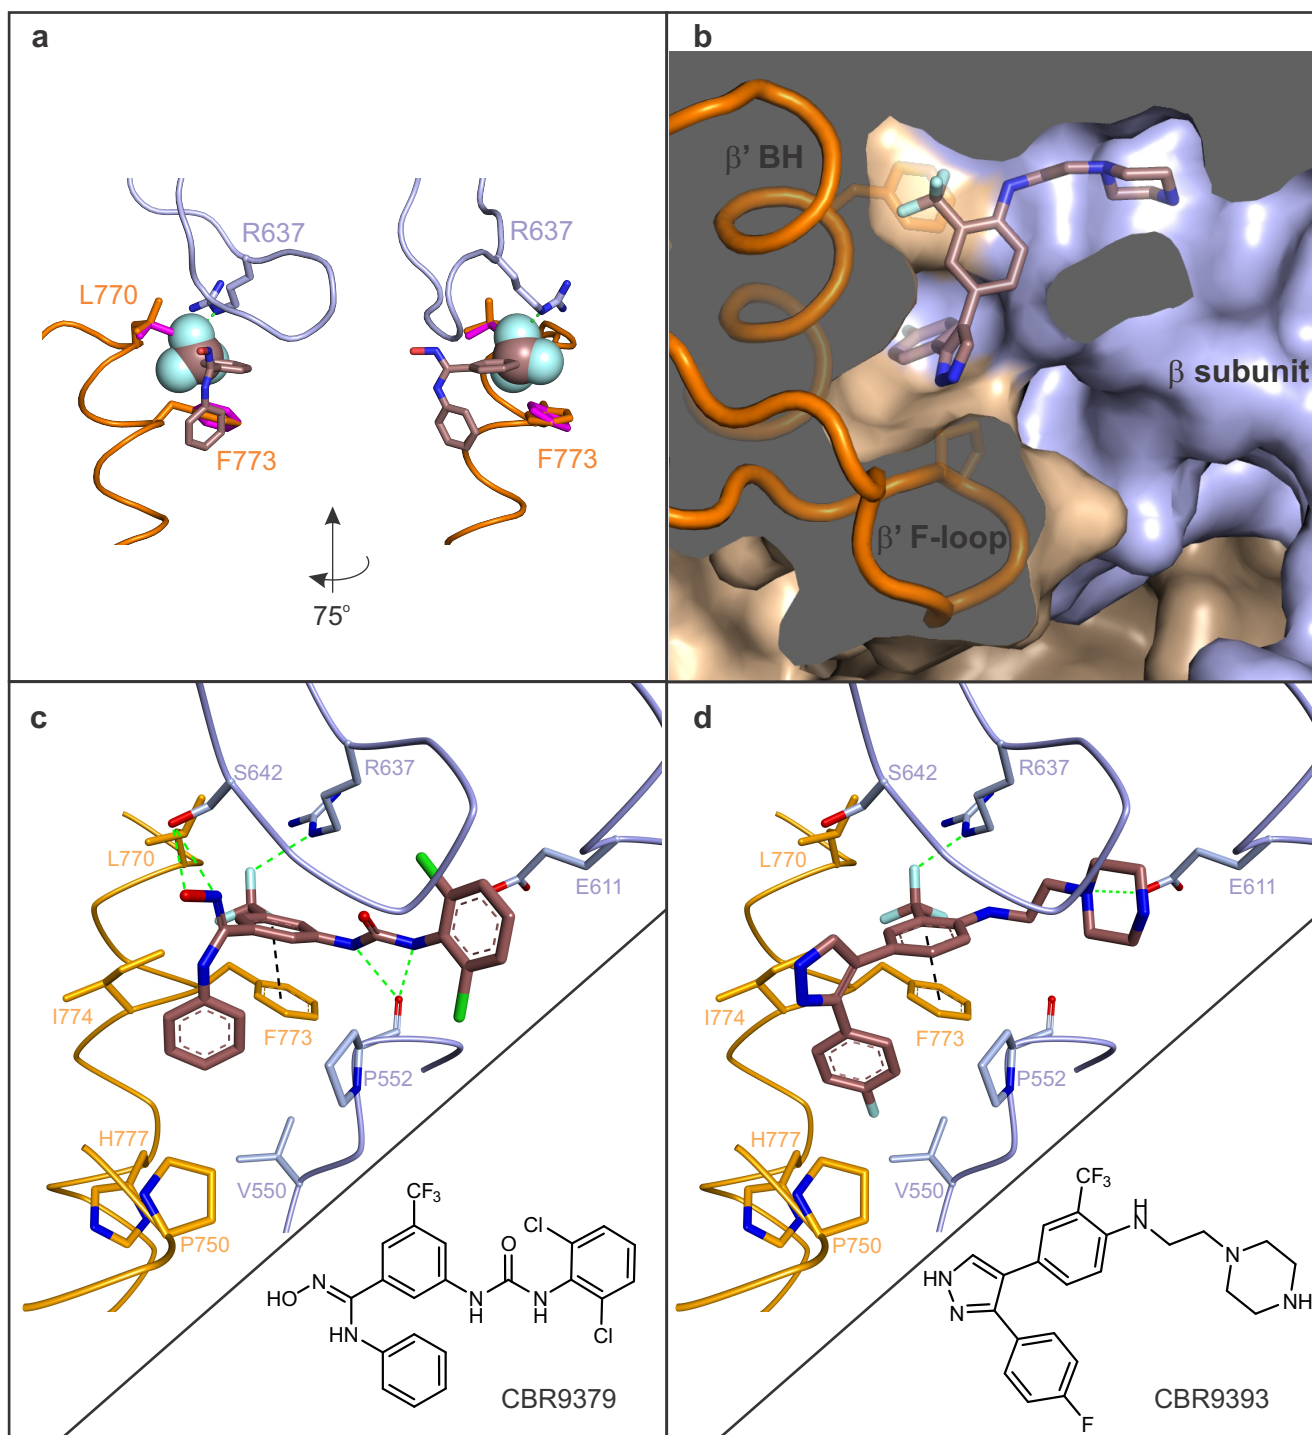

**Supplementary Figure 4: Binding site of CBR series inhibitors at the BH- $\beta$  subunit interface.** (a) Adjustments of  $\beta'$ Leu770 and  $\beta'$ Phe773 side chain positions were essential for recovery of a common binding mode for CBR703, CBR9379 and CBR9393. Trifluoromethyl group is depicted as spheres, the rest of CBR703 as sticks (brown carbons), selected elements of  $\beta$  (pastel blue) and  $\beta'$  (orange) subunits are represented by cartoons. The original conformations (PDB 4IGC) of  $\beta'$ Leu770 and  $\beta'$ Phe773 side chains are depicted as magenta sticks. (b) CBR binding cavity:  $\beta$  (pastel blue) and  $\beta'$  (orange) subunits are depicted as surfaces, BH and F-loop as orange cartoons,  $\beta'$ P750,  $\beta'$ F773 side chains (orange carbons) and CBR9393 (brown carbons) as sticks. (c, d) Best scoring (lowest negative binding energy) poses recovered for CBR9379 (c) and CBR9393 (d) by both GOLD and AutoDock Vina. Color coding as in main article Fig. 1b. Green and black dashed lines depict polar and  $\pi$ -stacking interactions, respectively. 2D structures of inhibitors are presented in insets. Figure was prepared using PyMOL Molecular Graphics System, Version 1.6.0.0 Schrödinger, LLC (a, b) and Discovery Studio 3.5 (Accelrys) (c, d). The sources of atomic coordinates are listed in Supplementary Table 3.

S041M-R024: GMP addition, Fig. 2, 3, 5,  
Supplementary Fig. 1, 2

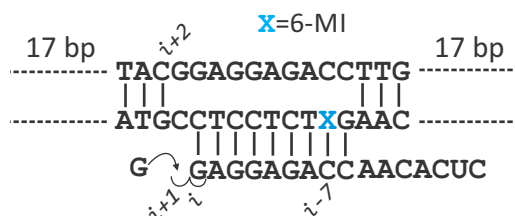

S048M-R024: CMP addition, Fig. 2, 3,  
Supplementary Fig. 2

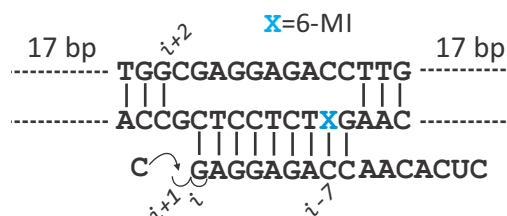

S056M-R024: AMP addition, Fig. 2a

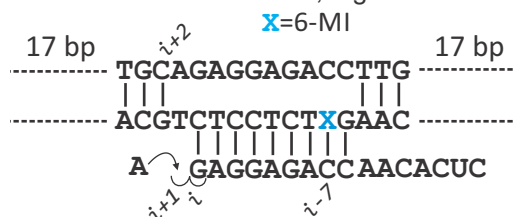

S058M-R024: UMP addition, Fig. 2a

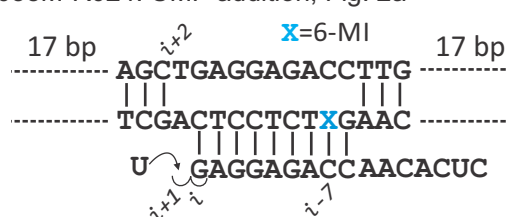

**Supplementary Figure 5: Nucleic acid components of TECs used in this study.** In Fig. 2 and Supplementary Fig. 1 the assembled TEC16s are extended by one nucleotide and the effects of low molecular weight ligands on fluorescence of TEC17s are studied. In Fig. 3, 5 and Supplementary Fig. 2 both the nucleotide incorporation by TEC16 and translocation of the extended, product TEC17s are resolved in time.

**Supplementary Table 1. *E. coli* RNAP expression vectors used in this study**

| Name   | Description                                                                                                   | Source/reference |
|--------|---------------------------------------------------------------------------------------------------------------|------------------|
| pVS10  | wild-type (T7p- $\alpha$ - $\beta$ - $\beta'$ -His <sub>6</sub> -T7p- $\omega$ )                              | Ref. 2           |
| pVS48  | $\beta'$ F773V (T7p- $\alpha$ - $\beta$ - $\beta'$ [F773V]-His <sub>6</sub> -T7p- $\omega$ )                  | Ref. 3           |
| pTG003 | $\beta'$ F773V,N792D (T7p- $\alpha$ - $\beta$ - $\beta'$ [F773V,N792D]-TEV_His <sub>10</sub> -T7p- $\omega$ ) | this work        |
| pTG004 | $\beta'$ N792D (T7p- $\alpha$ - $\beta$ - $\beta'$ [N792D]-TEV_His <sub>10</sub> -T7p- $\omega$ )             | this work        |
| pTG007 | $\beta'$ H777A (T7p- $\alpha$ - $\beta$ - $\beta'$ [H777A]-TEV_His <sub>10</sub> -T7p- $\omega$ )             | this work        |
| pTG012 | $\beta'$ P750L (T7p- $\alpha$ - $\beta$ - $\beta'$ [P750L]-TEV_His <sub>10</sub> -T7p- $\omega$ )             | this work        |
| pAM022 | $\beta$ V550A (T7p- $\alpha$ -His <sub>6</sub> - $\beta$ [V550A]- $\beta'$ - $\omega$ )                       | this work        |
| pAM023 | $\beta$ P560S,T563I (T7p- $\alpha$ -His <sub>6</sub> - $\beta$ [P560S,T563I]- $\beta'$ - $\omega$ )           | this work        |

Maps and sequences of the plasmids are available upon request.

**Supplementary Table 2. Template strand DNA oligonucleotides and RNA primers used in this study**

| Name  | Substrate | Sequence (5'→3')                                               | Employment                     |
|-------|-----------|----------------------------------------------------------------|--------------------------------|
| S041M | GTP       | GCTACTCTACTGACATGATGCCTCCTCT <del>X</del> GAACTTAGATCGCTACAAGT | Fig. 2, 3, 5, Suppl. Fig. 1, 2 |
| S048M | CTP       | GCTACTCTACTGACATGACCGCTCCTCT <del>X</del> GAACTTAGATCGCTACAAGT | Fig. 2, 3, Suppl. Fig. 2       |
| S056M | ATP       | GCTACTCTACTGCAATGACGT <del>CTCCTCT</del> XGAACTTAGATCGCTACAAGT | Fig. 2a                        |
| S058M | UTP       | GCTACTCTACTGCAATGTCGACTCCTCT <del>X</del> GAACTTAGATCGCTACAAGT | Fig. 2a                        |
| R024  | -         | Atto680-CUCACAACCAGAGGAG                                       | Fig. 2, 3, 5, Suppl. Fig. 1, 2 |

x = 6-methyl-isoxanthopterin (6-MI)

Sequences that base-pair with RNA in the initial TECs are underlined.

**Supplementary Table 3. The sources of atomic coordinates used to prepare Fig. 1, 6 and Supplementary Fig. 4**

| Figure         | RNAP                                                                                                              | RNA&DNA                          | Ligand(s)                                                                                                                 |
|----------------|-------------------------------------------------------------------------------------------------------------------|----------------------------------|---------------------------------------------------------------------------------------------------------------------------|
| Fig. 1a        | <i>T. thermophilus</i> TEC (PDB ID 2O5J), lineage specific domain ( $\beta'$ 132-456) omitted                     | <i>E. coli</i> TEC model, Ref. 1 | none                                                                                                                      |
| Fig. 1b        | <i>E. coli</i> holoenzyme PDB 4IGC, conformations of $\beta'$ Leu770 and $\beta'$ Phe773 altered (Suppl. Fig. 4a) | none                             | CBR703 docked with AutoDock Vina                                                                                          |
| Fig. 6a        | <i>T. thermophilus</i> TEC (PDB ID 2O5J), lineage specific domain ( $\beta'$ 132-456) omitted                     | <i>E. coli</i> TEC model, Ref. 1 | none                                                                                                                      |
| Fig. 6b        | <i>T. thermophilus</i> TEC (PDB ID 2O5J), lineage specific domain ( $\beta'$ 132-456) omitted                     | <i>E. coli</i> TEC model, Ref. 1 | CBR703 docked with AutoDock Vina<br>Myxopyronin (PDB ID 3EQL)<br>Rifapentin (PDB ID 2A69)<br>Streptolydigin (PDB ID 2PPB) |
| Suppl. Fig. 4a | <i>E. coli</i> holoenzyme PDB 4IGC, altered and original conformations of $\beta'$ Leu770 and $\beta'$ Phe773     | none                             | CBR703 docked with AutoDock Vina                                                                                          |
| Suppl. Fig. 4b | <i>E. coli</i> holoenzyme PDB 4IGC conformations of $\beta'$ Leu770 and $\beta'$ Phe773 altered (Suppl. Fig. 4a)  | none                             | CBR9393 docked with AutoDock Vina.<br>GOLD recovered very similar pose.                                                   |
| Suppl. Fig. 4c | <i>E. coli</i> holoenzyme PDB 4IGC, conformations of $\beta'$ Leu770 and $\beta'$ Phe773 altered (Suppl. Fig. 4a) | none                             | CBR9379 docked with GOLD. AutoDock Vina recovered very similar pose.                                                      |
| Suppl. Fig. 4d | <i>E. coli</i> holoenzyme PDB 4IGC, conformations of $\beta'$ Leu770 and $\beta'$ Phe773 altered (Suppl. Fig. 4a) | none                             | CBR9393 docked with AutoDock Vina.<br>GOLD recovered very similar pose.                                                   |

**Supplementary Table 4. Parameters describing titrations of TEC17s with TGT, CBR703, STL and CMPCPP**

| Fig. | RNAP                 | template | 3' NMP | L      | L2                       | $K_L, \mu\text{M}$ | $F^{\text{TEC17-L}}$ (normalized) |
|------|----------------------|----------|--------|--------|--------------------------|--------------------|-----------------------------------|
| 2b   | $\beta'$ F773V,N792D | S041M    | GMP    | CMPCPP |                          | 9±2                | 0.85 ±0.05                        |
| 2b   | $\beta'$ F773V,N792D | S041M    | GMP    | TGT    |                          | 0.027 ±0.003       | 0                                 |
| 2b   | $\beta'$ F773V,N792D | S041M    | GMP    | CBR703 |                          | 47 ±14             | 0.88 ±0.13                        |
| 2b   | $\beta'$ F773V,N792D | S048M    | CMP    | CBR703 |                          | 28 ±7              | 0.75 ±0.15                        |
| 2b   | $\beta'$ F773V,N792D | S048M    | CMP    | STL    |                          | 0.24 ±0.13         | 1.0 ±0.1                          |
| 2c   | $\beta'$ N792D       | S041M    | GMP    | TGT    |                          | 0.055 ±0.007       | 0                                 |
| 2c   | $\beta'$ N792D       | S041M    | GMP    | TGT    | 100 $\mu\text{M}$ CBR703 | 0.36 ±0.05         | 0.25 ±0.09                        |
| 2c   | $\beta'$ N792D       | S041M    | GMP    | TGT    | 0.75 $\mu\text{M}$ STL   | 0.28 ±0.04         | 0.2 ±0.1                          |
| 2c   | $\beta'$ N792D       | S041M    | GMP    | STL    | 0.1 $\mu\text{M}$ TGT    | 0.97 ±0.13         | 1 ±0.1                            |
| 2c   | $\beta'$ N792D       | S041M    | GMP    | CBR703 | 0.1 $\mu\text{M}$ TGT    | 7.0 ±1.5           | 0.78 ±0.08                        |

Errors are standard deviations of the best fit estimates for parameters and were calculated by nonlinear regression of the 6-MI fluorescence intensities versus L concentration using model for fitting equilibrium titration data described on page 8 of Supplementary Information.

**Supplementary Table 5. Parameters describing kinetics of nucleotide addition and translocation (Fig. 3, Supplementary Fig. 2)**

| Figures                     | RNAP                  | substrate | CBR703            | $k_{c+1}$                                                                                                                       | $k_{t+1}$             | $k_{l-1}$             | $k_{t+1}$             | $k_{i-1}$                 |
|-----------------------------|-----------------------|-----------|-------------------|---------------------------------------------------------------------------------------------------------------------------------|-----------------------|-----------------------|-----------------------|---------------------------|
| Fig. 3a, 3c, Suppl. Fig. 2a | $\beta'$ N792D        | GTP       |                   | 36 ±2<br>(28-49)                                                                                                                | 56 ±3<br>(41-73)      | 0                     | 3.3 ±0.3<br>(1.6-6.6) | 0.35 ±0.06<br>(0.1-1.1)   |
| Fig. 3a, 3c, Suppl. Fig. 2a | $\beta'$ N792D        | GTP       | 100 $\mu\text{M}$ | 18 ±1<br>(14-23)                                                                                                                | 30 ±2<br>(24-42)      | 0                     | 1.0 ±0.1<br>(0.8-1.5) | 0.18 ±0.01<br>(0.1-0.3)   |
| Fig. 3c, Suppl. 2b          | $\beta$ P560S,T563I   | GTP       |                   | 56 ±2<br>(45-62)                                                                                                                | 29 ±1<br>(26-37)      | 0                     | 2.3 ±0.2<br>(1.2-4.8) | 0.40 ±0.06<br>(0.2-1.2)   |
| Fig. 3c, Suppl. Fig. 2b     | $\beta$ P560S,T563I   | GTP       | 100 $\mu\text{M}$ | 16 ±1<br>(10-17)                                                                                                                | 26 ±1<br>(23-50)      | 0                     | 0.9 ±0.1<br>(0.6-1.3) | 0.26 ±0.02<br>(0.1-0.4)   |
| Fig. 3b, 3c, Suppl. 2c      | $\beta'$ F773V, N792D | GTP       |                   | 49 ±2<br>(44-55)                                                                                                                | 8.2 ±0.2<br>(7.2-9.4) | 5.4 ±0.2<br>(4.8-6.4) | 1.5 ±0.2<br>(0.5-3.6) | 0.18 ±0.04<br>(0.04-0.7)  |
| Fig. 3b, 3c, Suppl. Fig. 2c | $\beta'$ F773V, N792D | GTP       | 100 $\mu\text{M}$ | 46 ±2<br>(39-55)                                                                                                                | 15.8 ±0.4<br>(14-18)  | 4.4 ±0.1<br>(4.0-5.1) | 1.4 ±0.2<br>(0.6-3.5) | 0.14 ±0.02<br>(0.04-0.5)  |
| Fig. 3c, Suppl. Fig. 2d     | $\beta$ V550A         | GTP       |                   | 46 ±2<br>(39-54)                                                                                                                | 36 ±1<br>(32-42)      | 0                     | 1.0 ±0.1<br>(0.4-2.4) | 0.07 ±0.01<br>(0.03-0.2)  |
| Fig. 3c, Suppl. Fig. 2d     | $\beta$ V550A         | GTP       | 100 $\mu\text{M}$ | 31 ±1<br>(28-35)                                                                                                                | 52 ±2<br>(44-60)      | 0                     | 0.7 ±0.1<br>(0.4-1.5) | 0.06 ±0.01<br>(0.03-0.1)  |
| Fig. 3c, Suppl. Fig. 2e     | $\beta'$ P750L        | GTP       |                   | 22 ±1<br>(21-26)                                                                                                                | 9.3 ±0.2<br>(8.8-10)  | 6.4 ±0.1<br>(6-7)     | 0.6 ±0.1<br>(0.4-1)   | 0.11 ±0.01<br>(0.07-0.17) |
| Fig. 3c, Suppl. Fig. 2e     | $\beta'$ P750L        | GTP       | 100 $\mu\text{M}$ | 20 ±1<br>(18-24)                                                                                                                | 34 ±2<br>(28-39)      | 0                     | 0.6 ±0.1<br>(0.5-0.7) | 0.09 ±0.01<br>(0.06-0.12) |
| Fig. 3c, Suppl. Fig. 2g     | $\beta'$ F773V, N792D | CTP       |                   | 143 ±3<br>(133-156)                                                                                                             | 8.8 ±0.2<br>(8.2-9.4) | 21.0 ±0.4<br>(20-23)  | 0.5 ±0.1<br>(0.2-1.0) | 0.07 ±0.01<br>(0.03-0.1)  |
| Fig. 3c, Suppl. Fig. 2g     | $\beta'$ F773V, N792D | CTP       | 100 $\mu\text{M}$ | 86 ±2<br>(79-94)                                                                                                                | 23.0 ±0.3<br>(22-24)  | 12.4 ±0.2<br>(12-13)  | 0.5 ±0.1<br>(0.3-0.7) | 0.05 ±0.01<br>(0.03-0.08) |
| Fig. 3c, Suppl. Fig. 2f     | $\beta'$ H777A        | GTP       |                   | 30 ±1<br>(26-37)                                                                                                                | 72 ±4<br>(54-91)      | 0                     | 1.1 ±0.1<br>(0.9-1.6) | 0.23 ±0.02<br>(0.2-0.4)   |
| Fig. 3c, Suppl. Fig. 2f     | $\beta'$ H777A        | GTP       | 100 $\mu\text{M}$ | Not applicable. See fitting of nucleotide addition and translocation as a function of [CBR703] on page 10 of Suppl. Information |                       |                       |                       |                           |

Errors are standard deviations of the best fit estimates for parameters and were calculated by nonlinear regression of the 6-MI fluorescence and RNA17 band intensities versus time using model for fitting of nucleotide addition and translocation data described on page 9 of Supplementary Information. Values in parentheses indicate lower and upper bounds of parameters calculated at a 10% increase in  $\text{Chi}^2$  over the minimal value using FitSpace routine of Kintek Explorer.

## Supplementary Methods

### Data normalization (applies to all fluorescence data in this study)

Equilibrium levels of fluorescence of extended TECs (TEC17s) were extrapolated to 100% incorporation efficiency, the TEC16 fluorescence was subtracted, and the resulting value was normalized to that of 2'dNMP extended TECs. For example, for GMP extended TEC normalization was performed as follows:

$$\text{Normalized fluorescence of TEC17} = \frac{\frac{\text{Fluorescence of GMP extended TEC17}}{\text{GMP incorporation efficiency}} - \text{Fluorescence of TEC16}}{\frac{\text{Fluorescence of 2'dGMP extended TEC17}}{\text{2'dGMP incorporation efficiency}} - \text{Fluorescence of TEC16}}$$

### Model employed for fitting equilibrium titration data (Fig. 2, Supplementary Table 4)

#### System of equations:

$$F = F^{\text{TEC17}\cdot\text{L}} \times \text{TEC17}\cdot\text{L} - F^{\text{TEC17}} \times (\text{TEC17}_{\text{total}} - \text{TEC17}\cdot\text{L})$$

$$K_L = \frac{(\text{TEC17}_{\text{total}} - \text{TEC17}\cdot\text{L}) \times (\text{L}_{\text{total}} - \text{TEC17}\cdot\text{L})}{\text{TEC17}\cdot\text{L}}$$

#### Constrains:

$$0 < \text{TEC17}\cdot\text{L} < \text{TEC17}_{\text{total}}$$

$$0 < \text{TEC17}\cdot\text{L} < \text{L}_{\text{total}}$$

$$0 < K_L$$

Independent variables:  $\text{L}_{\text{total}}$ , total ligand concentration

#### Dependent variables:

F - Fluorescence of 6-MI base in TEC17

#### Parameters:

$K_L$  - equilibrium constant of ligand (L) binding

$F^{\text{TEC17}}$  -normalization coefficient (fluorescence of unligated TEC17)

$F^{\text{TEC17}\cdot\text{L}}$  -normalization coefficient (fluorescence of ligand saturated TEC17)



**Model employed for fitting of nucleotide addition and translocation data (Fig. 3, Supplementary Fig. 2 and Supplementary Table 5)**

Initial conditions (See Note 1):

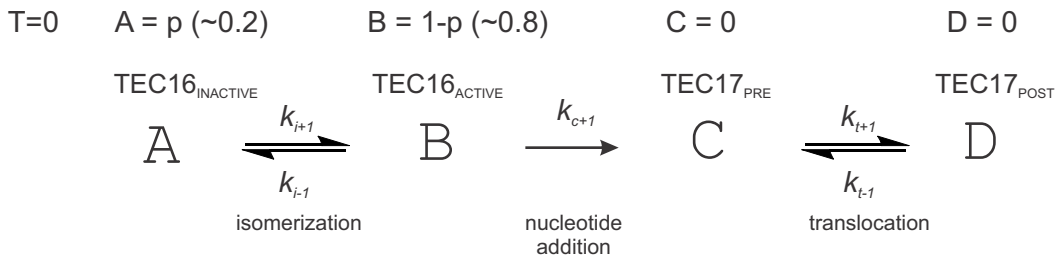

Rate equations (See Note2):

$$A' = -A \cdot k_{i+1} + B \cdot k_{i-1}$$

$$B' = -B \cdot k_{c+1} - B \cdot k_{i-1} + A \cdot k_{i+1}$$

$$C' = -C \cdot k_{t+1} + B \cdot k_{c+1} + D \cdot k_{t-1}$$

$$D' = -D \cdot k_{t-1} + C \cdot k_{t+1}$$

Equations for dependent variables:

$$RNA17 = F1 \cdot (C + D)$$

$$SF\_fluorescence = F2 \cdot (A + B + C) + F3 \cdot D$$

Independent variables: T -time

Dependent variables:

RNA17 -RNA17 band intensities from quench flow experiment

SF\_fluorescence -Fluorescent trace from stopped-flow experiment

Parameters:

$k_{i+1}$  -rate of isomerization of inactive TEC into active TEC

$k_{i-1}$  -rate of isomerization of active TEC into inactive TEC

$k_{c+1}$  -rate of nucleotide incorporation

$k_{t+1}$  -rate of forward translocation

$k_{t-1}$  -rate of backward translocation (See Note 3)

F1 -normalization coefficient for quench flow data

F2 -normalization coefficient for stopped-flow data (See Note 4)

F3 -normalization coefficient for stopped-flow data (See Note 4)

p -fraction of inactive TEC (See Note 1)

Note 1: The fraction of inactive TEC ("p" parameter) is determined by  $k_{i+1}$  and  $k_{i-1}$  because TEC16 is assembled and reaches equilibrium in the absence of NTP. To reflect this condition we introduced a 100 s mixing step without NTP into the Kintek Explorer virtual experiment setup. The initial fractions of active and inactive TEC16 can then be chosen arbitrary, the "p" parameter is redundant and is not explicitly used.

Note 2: Rate equations are uniquely defined by the reaction scheme and do not need to be explicitly specified when fitting data with Kintek Explorer.

Note 3:  $k_{t-1}$  was fixed to zero for all but  $\beta'$ F773V datasets and  $\beta'$ P750L dataset without CBR703.

Note 4: F2, F3 were allowed to vary when  $k_{t-1}$  is fixed to zero (all but  $\beta'$ F773V datasets and  $\beta'$ P750L dataset without CBR). When  $k_{t-1}$  was allowed to vary ( $\beta'$ F773V datasets and  $\beta'$ P750L dataset without CBR) the data were pre-normalized and F2, F3 were constrained based on the equilibrium levels of fluorescence of extended TECs (Fig. 2 and Supplementary Fig. 1).

**Fitting of nucleotide addition and translocation data as a function of [CBR703] (Fig. 5 and Supplementary Fig. 2f)**

**Wild-type RNAP  
( $\beta'$ N792D)**

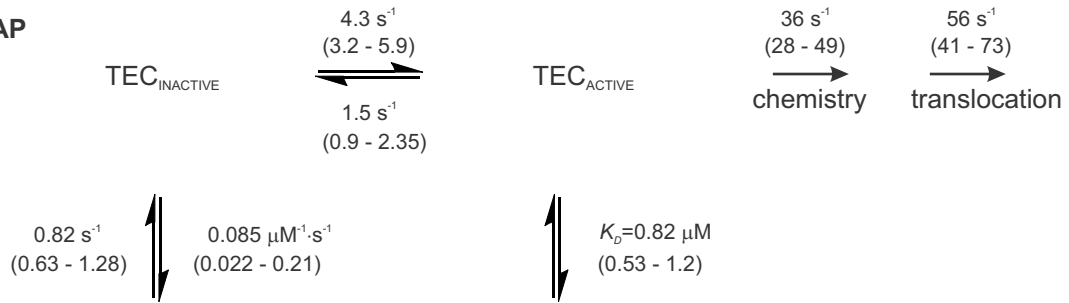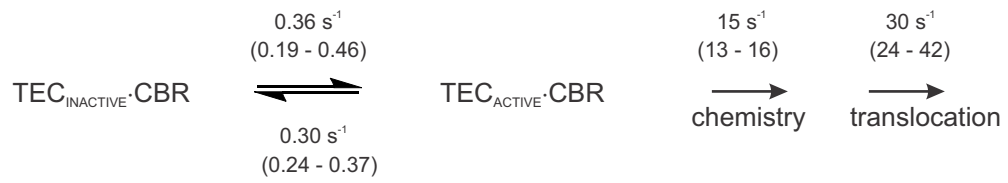

**$\beta'$ H777A RNAP**

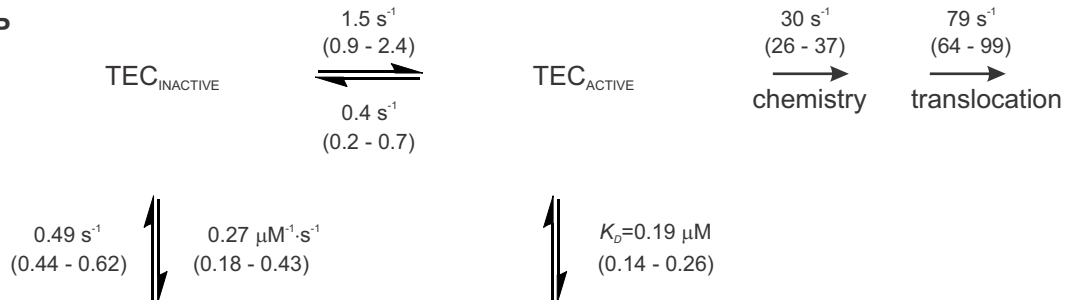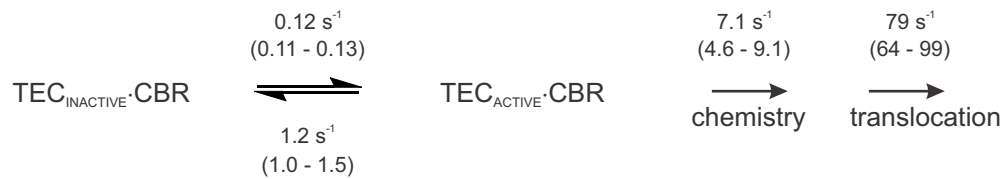

Values in parentheses indicate lower and upper bounds of parameters calculated at a 10% increase in  $\text{Chi}^2$  over the minimal value using FitSpace routine of Kintek Explorer

**Supplementary References**

1. Opalka, N. et al. Complete structural model of *Escherichia coli* RNA polymerase from a hybrid approach. *PLoS Biol.* **8**, doi: 10.1371/journal.pbio.1000483 (2010).
2. Belogurov, G. A. et al. Structural basis for converting a general transcription factor into an operon-specific virulence regulator. *Mol. Cell* **26**, 117–129 (2007).
3. Svetlov, V., Belogurov, G. A., Shabrova, E., Vassilyev, D. G. & Artsimovitch, I. Allosteric control of the RNA polymerase by the elongation factor RfaH. *Nucleic Acids Res.* **35**, 5694–5705 (2007).
